# Supplementary material for: Yes-Associated Protein 1 Is a Novel Calcium Sensing Receptor Target in Human Parathyroid Tumors
Source: PubMed Central journal article supplement (PMC7922006; doi:10.3390/ijms22042016), 2021-02-18
Supplement: ijms-22-02016-s001.pdf [file ijms-22-02016-s001.pdf]

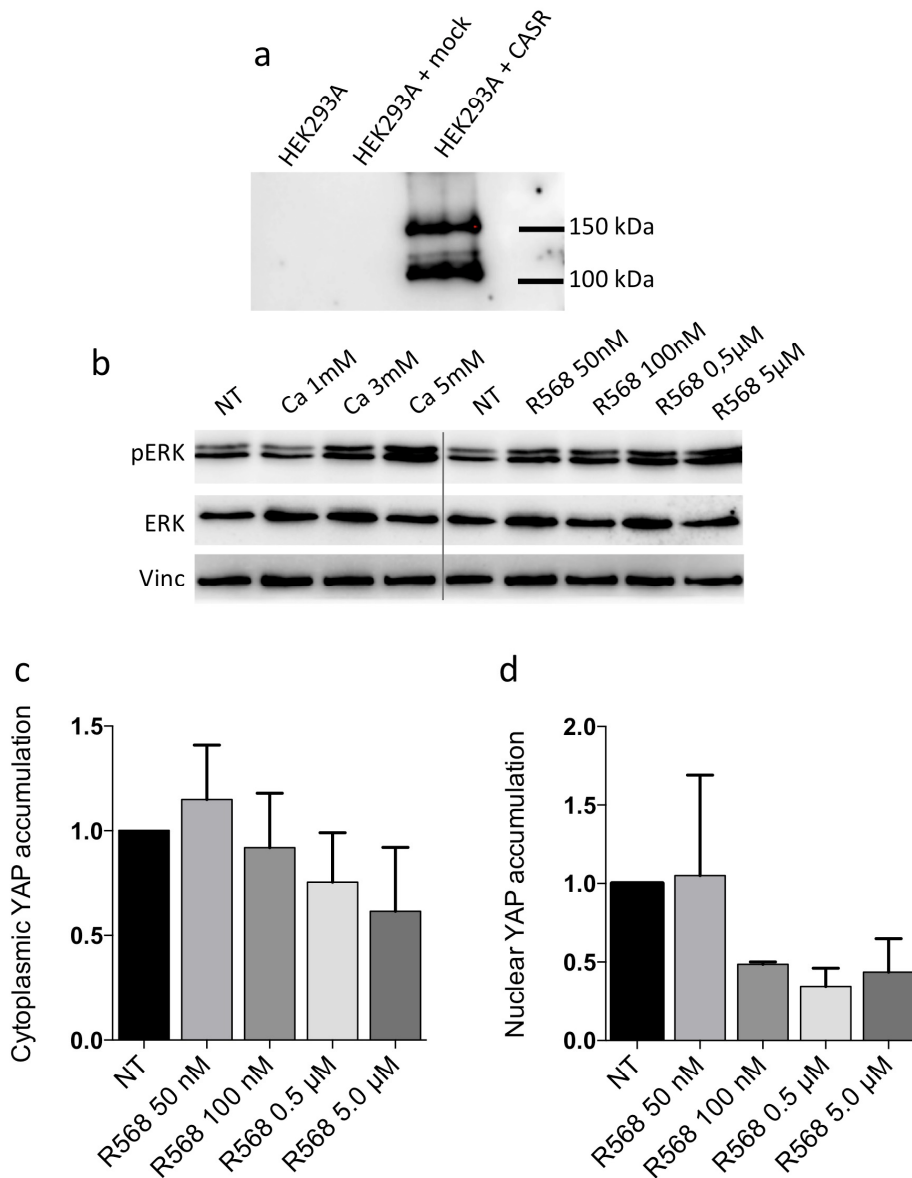

**Supplementary Figure 1.** (a) Detection of the calcium sensing receptor (CASR) protein after 48 hours from transient transfection in HEK293A cells, with the expected double bands at 120 and 150 kDa. (b) Stimulatory effect of increasing  $[Ca^{2+}]_o$  and of increasing concentrations of the CASR agonist R568 on phosphorylated ERK (pERK) and total ERK in HEK293A cells transiently transfected with CASR (CASR-HEK293A cells). (c) No effect of increasing concentrations of R568 on cytoplasmic YAP1 accumulation in HEK293A cells transfected with mock. (d) No effect of increasing concentrations of R568 on nuclear YAP1 accumulation in HEK293A cells transfected with mock
